# Supplementary material for: Racism and psychosis: an umbrella review and qualitative analysis of the mental health consequences of racism
Source: Springer Nature journal article supplement (doi:10.1007/s00406-022-01468-8), 2022-08-24
Supplement: MOESM1 [file 23399748]

Supplementary material 1. Data extraction of the included meta-analyses

| pooled | Studie              | FGM<br>SGM  | Riskfactor     | Impact | Diagnosis | k  | N1cases | N2contro<br>ls | N3 = sample<br>size | Rando<br>m_ effe<br>cts_ me<br>asure | value | lower | upper | p      | Common<br>_ effects_<br>measure | valueD |
|--------|---------------------|-------------|----------------|--------|-----------|----|---------|----------------|---------------------|--------------------------------------|-------|-------|-------|--------|---------------------------------|--------|
|        | 4 Selten et al., 2  | FGM,<br>SGM | "developed"    | Mig    | NAP       | 19 |         |                |                     | RR                                   | 1.66  | 1.49  | 1.84  |        | d                               | 0.28   |
|        | 4 Cantor-Graae      | FGM,<br>SGM | "developed"    | Mig    | SCZ       | 11 | 980     | 14868          | 15848               | RR                                   | 2.3   | 1.7   | 3.1   |        | d                               | 0.46   |
|        | 5 Selten et al., 2  | FGM,<br>SGM | "developing"   | Mig    | NAP       | 30 |         |                |                     | RR                                   | 2.54  | 2.26  | 2.86  | <0,001 | d                               | 0.51   |
|        | 5 Cantor-Graae      | FGM,<br>SGM | "developing"   | Mig    | SCZ       | 35 | 2140    | 25904          | 28044               | RR                                   | 3.2   | 2.8   | 3.9   |        | d                               | 0.64   |
|        | 6 Selten et al., 2  | FGM,<br>SGM | to Great Brita | Mig    | NAP       | 18 | 2025    | 6528           | 8553                | RR                                   | 2.69  | 2.2   | 3.28  |        | d                               | 0.55   |
|        | 6 Bourque et al     | FGM         | to Great Brita | Mig    | PD        | 24 | 1291    | 5843           | 7134                | IRR                                  | 2.8   | 2.2   | 3.5   |        | d                               | 0.57   |
|        | 6 Bourque et al     | SGM         | to Great Brita | Mig    | PD        | 9  | 148     | 200            | 348                 | IRR                                  | 3.7   | 2.1   | 6.6   |        | d                               | 0.72   |
|        | 7 Selten et al., 2  | FGM,<br>SGM | to Scandinavi  | Mig    | NAP       | 11 | 6651    | 37043          | 43694               | RR                                   | 1.89  | 1.79  | 2     |        | d                               | 0.35   |
|        | 7 Bourque et al     | FGM         | to Scandinavi  | Mig    | PD        | 15 | 1919    | 14135          | 16054               | IRR                                  | 2.3   | 1.9   | 2.7   |        | d                               | 0.46   |
|        | 7 Bourque et al     | SGM         | to Scandinavi  | Mig    | PD        | 8  | 2518    | 23843          | 26361               | IRR                                  | 1.8   | 1.6   | 2     |        | d                               | 0.32   |
|        | 8 Selten et al., 2  | FGM,<br>SGM | to the Nether  | Mig    | NAP       | 4  | 2298    | 13198          | 15496               | RR                                   | 2.98  | 2.43  | 3.66  |        | d                               | 0.60   |
|        | 8 Bourque et al     | FGM         | to the Nether  | Mig    | PD        | 10 | 1091    | 11780          | 12871               | IRR                                  | 2.5   | 2     | 3.2   |        | d                               | 0.51   |
|        | 8 Bourque et al     | SGM         | to the Nether  | Mig    | PD        | 6  | 48      | 79             | 127                 | IRR                                  | 3     | 2.1   | 4.4   |        | d                               | 0.61   |
|        | 9 Selten et al., 2  | FGM,<br>SGM | to Israel      | Mig    | NAP       | 3  | 3252    | 1406           | 4658                | RR                                   | 1.22  | 0.99  | 1.5   |        | d                               | 0.11   |
|        | 9 Bourque et al     | FGM         | to Israel      | Mig    | PD        | 7  | 284     | 46             | 330                 | IRR                                  | 1.5   | 1.1   | 2.1   |        | d                               | 0.22   |
|        | 9 Bourque et al     | SGM         | to Israel      | Mig    | PD        | 5  | 1801    | 238            | 2039                | IRR                                  | 1.1   | 0.9   | 1.3   |        | d                               | 0.05   |
| np     | Selten et al., 2    | FGM,<br>SGM | to Southern E  | Mig    | NAP       | 4  | 293     | 754            | 1047                | RR                                   | 2.79  | 1.94  | 4.01  |        | d                               | 0.57   |
| np     | Selten et al., 2    | FGM,<br>SGM | to Canada      | Mig    | NAP       | 2  | 2853    | 21218          | 24071               | RR                                   | 1.21  | 0.85  | 1.74  |        | d                               | 0.11   |
|        | 10 Kirkbride et a   | FGM,<br>SGM | from the Cari  | Mig    | SCZ       | 5  | 271     | 403            | 674                 | RR                                   | 5.6   | 3.4   | 9.2   |        | d                               | 0.95   |
|        | 10 Bourque et al    | FGM         | from the Cari  | Mig    | PD        | 12 | 1487    | 1625           | 18012               | RR                                   | 3.9   | 3.4   | 4.6   |        | d                               | 0.75   |
|        | 10 Bourque et al    | SGM         | from the Cari  | Mig    | PD        | 7  | 224     | 10048          | 10272               | RR                                   | 5.8   | 3.5   | 7.4   |        | d                               | 0.97   |
|        | 13 Selten et al., 2 | FGM,<br>SGM | from North A   | Mig    | NAP       | 4  |         |                |                     | RR                                   | 2.88  | 1.85  | 4.49  |        | d                               | 0.58   |

## Supplementary material 1. Data extraction of the included meta-analyses

|    |    |                 |             |               |     |     |  |    |     |       |       |    |      |      |      |  |   |       |
|----|----|-----------------|-------------|---------------|-----|-----|--|----|-----|-------|-------|----|------|------|------|--|---|-------|
|    | 13 | Nielssen et al  | FGM         | from North A  | Mig | PD  |  | 10 |     |       |       | OR | 1.02 | 0.76 | 1.37 |  | d | 0.01  |
|    | 11 | Kirkbride et al | FGM,<br>SGM | from Sub-Sah  | Mig | SCZ |  | 5  | 271 | 403   | 674   | RR | 4.7  | 3.3  | 6.8  |  | d | 0.85  |
|    | 11 | Bourque et al   | FGM         | from Sub-Sah  | Mig | PD  |  | 6  | 224 | 10048 | 10272 | RR | 4.3  | 2.8  | 6.8  |  | d | 0.80  |
|    | 11 | Nielssen et al  | FGM         | from Sub-Sah  | Mig | PD  |  | 10 |     |       |       | OR | 1.04 | 0.87 | 1.25 |  | d | 0.02  |
|    | 11 | Selten et al.,  | FGM,<br>SGM | from Sub-Sah  | Mig | NAP |  | 13 |     |       |       | RR | 2.99 | 2.3  | 3.89 |  | d | 0.60  |
| np |    | Bourque et al   | FGM         | from the Mid  | Mig | PD  |  | 5  | 121 | 9738  | 9859  | RR | 2.3  | 1.4  | 4    |  | d | 0.46  |
| np |    | Bourque et al   | SGM         | from the Mid  | Mig | PD  |  | 2  | 36  | 79    | 115   | RR | 2.3  | 1.4  | 4    |  | d | 0.46  |
|    | 12 | Kirkbride et al | FGM,<br>SGM | from Asia     | Mig | SCZ |  | 3  | 259 | 165   | 424   | RR | 2.4  | 1.3  | 4.5  |  | d | 0.48  |
|    | 12 | Bourque et al   | FGM         | from Asia     | Mig | PD  |  | 7  | 326 | 13711 | 14037 | RR | 1.7  | 1.3  | 2.3  |  | d | 0.29  |
|    | 12 | Bourque et al   | SGM         | from Asia     | Mig | PD  |  | 2  | 21  | 108   | 129   | RR | 1.3  | 0.8  | 2.1  |  | d | 0.14  |
|    | 12 | Nielssen et al  | FGM         | from Asia     | Mig | PD  |  | 10 |     |       |       | OR | 0.77 | 0.55 | 1.09 |  | d | -0.14 |
|    | 12 | Nielssen et al  | FGM         | from Asia     | Mig | PD  |  | 10 |     |       |       | OR | 0.82 | 0.63 | 1.08 |  | d | -0.11 |
|    | 12 | Nielssen et al  | FGM         | from Asia     | Mig | PD  |  | 10 |     |       |       | OR | 0.93 | 0.67 | 1.3  |  | d | -0.04 |
|    | 12 | Selten et al.,  | FGM,<br>SGM | from Asia     | Mig | NAP |  | 7  |     |       |       | RR | 1.65 | 1.31 | 2.07 |  | d | 0.28  |
|    | 12 | Selten et al.,  | FGM,<br>SGM | from Asia     | Mig | NAP |  | 15 |     |       |       | RR | 1.52 | 1.22 | 1.89 |  | d | 0.23  |
| np |    | Nielssen et al  | FGM         | from New Zea  | Mig | PD  |  | 10 |     |       |       | OR | 1.16 | 0.51 | 2.65 |  | d | 0.08  |
| np |    | Nielssen et al  | FGM         | from Ozeania  | Mig | PD  |  | 10 |     |       |       | OR | 1.65 | 1.16 | 2.35 |  | d | 0.28  |
|    | 14 | Nielssen et al  | FGM<br>NwEU | from North-W  | Mig | PD  |  | 10 |     |       |       | OR | 0.81 | 0.61 | 1.07 |  | d | -0.12 |
|    | 14 | Selten et al.,  | FGM,<br>SGM | from North-W  | Mig | NAP |  | 13 |     |       |       | RR | 1.62 | 1.41 | 1.86 |  | d | 0.27  |
|    | 15 | Selten et al.,  | FGM,<br>SGM | from South- c | Mig | NAP |  | 7  |     |       |       | RR | 1.93 | 1.38 | 2.7  |  | d | 0.36  |
|    | 15 | Nielssen et al  | FGM         | from South- c | Mig | PD  |  | 10 |     |       |       | OR | 1.25 | 1.03 | 1.51 |  | d | 0.12  |
| np |    | Nielssen et al  | FGM         | from the US   | Mig | PD  |  | 10 |     |       |       | OR | 1.21 | 0.89 | 1.64 |  | d | 0.11  |

Supplementary material 1. Data extraction of the included meta-analyses

| lowerD | upperD | I2   | p(I2) | Q     | p(Q)  |
|--------|--------|------|-------|-------|-------|
| 0.22   | 0.34   | 97.1 |       |       |       |
| 0.29   | 0.62   |      |       |       |       |
| 0.45   | 0.58   | 97.6 |       |       |       |
| 0.57   | 0.75   |      |       |       |       |
| 0.43   | 0.65   | 98.7 |       |       |       |
| 0.43   | 0.69   | 93   |       | 237.2 | <0,01 |
| 0.41   | 1.04   | 87.6 |       | 64.5  | <0,01 |
| 0.32   | 0.38   | 93   |       |       |       |
| 0.35   | 0.55   | 92.4 |       | 185   | <0,01 |
| 0.26   | 0.38   | 84.8 |       | 46    | <0,01 |
| 0.49   | 0.72   | 84.5 |       |       |       |
| 0.38   | 0.64   | 85.3 |       | 61.2  | <0,01 |
| 0.41   | 0.82   | 30.7 |       | 7.2   |       |
| -0.01  | 0.22   | 95.5 |       |       |       |
| 0.05   | 0.41   | 51.9 |       | 12.5  | <0,1  |
| -0.06  | 0.14   | 68.8 |       | 12.8  | <0,05 |
| 0.37   | 0.77   | 83.6 |       |       |       |
| -0.09  | 0.31   | 91.2 |       |       |       |
| 0.67   | 1.22   | 77   |       |       |       |
| 0.67   | 0.84   | 74.2 |       | 42.6  | <0,01 |
| 0.69   | 1.10   | 77.2 |       | 26.3  | <0,01 |
| 0.34   | 0.83   | 68.7 |       |       |       |

Supplementary material 1. Data extraction of the included meta-analyses

|       |      |      |  |      |       |
|-------|------|------|--|------|-------|
| -0.15 | 0.17 |      |  |      |       |
| 0.66  | 1.06 | 47   |  |      |       |
| 0.57  | 1.06 | 86.9 |  | 38.1 | <0,01 |
| -0.08 | 0.12 |      |  |      |       |
| 0.46  | 0.75 | 91.6 |  |      |       |
| 0.19  | 0.76 | 87.5 |  | 31.9 | <0,01 |
| 0.19  | 0.76 | 65.8 |  | 2.93 | <0,01 |
| 0.14  | 0.83 | 42   |  |      |       |
| 0.14  | 0.46 | 81.4 |  | 32.2 | <0,01 |
| -0.12 | 0.41 | 0    |  | 0.06 | <0,01 |
| -0.33 | 0.05 |      |  |      |       |
| -0.25 | 0.04 |      |  |      |       |
| -0.22 | 0.14 |      |  |      |       |
| 0.15  | 0.40 | 79.6 |  |      |       |
| 0.11  | 0.35 | 89.2 |  |      |       |
| -0.37 | 0.54 |      |  |      |       |
| 0.08  | 0.47 |      |  |      |       |
| -0.27 | 0.04 |      |  |      |       |
| 0.19  | 0.34 | 98   |  |      |       |
| 0.18  | 0.55 | 93.3 |  |      |       |
| 0.02  | 0.23 |      |  |      |       |
| -0.06 | 0.27 |      |  |      |       |
