# Supplementary material for: Racism and psychosis: an umbrella review and qualitative analysis of the mental health consequences of racism
Source: Springer Nature journal article supplement (doi:10.1007/s00406-022-01468-8), 2022-08-24
Supplement: MOESM2 [file 23399748]

**Supplementary material 2.** Quality assessment: AMSTAR index (2007)(1)

| Author                       | a priori design? | Duplicate study selection & data extraction? | Performance of comprehensive literature search? | Status of publication used as inclusion criteria? | List of studies included and excluded provided? | Characteristics of included studies provided? | Scientific quality of included studies assessed, documented? | Scientific quality of included studies used appropriately for formulating conclusions? | Methods used to combine studies appropriate? | Assessment of likelihood of publication bias? | Conflict of interest stated? | AMSTAR rating |
|------------------------------|------------------|----------------------------------------------|-------------------------------------------------|---------------------------------------------------|-------------------------------------------------|-----------------------------------------------|--------------------------------------------------------------|----------------------------------------------------------------------------------------|----------------------------------------------|-----------------------------------------------|------------------------------|---------------|
| Selten et al. 2020 (2)       | y                | y                                            | y                                               | y (published peer review only)                    | n                                               | y                                             | y                                                            | y                                                                                      | y                                            | y                                             | y                            | 9/11          |
| Cantor-Graae et al. 2005 (3) | y                | y                                            | y                                               | y (published peer review only)                    | n                                               | y                                             | n                                                            | y                                                                                      | y                                            | y                                             | n                            | 8/11          |
| Bourque et al. 2011 (4)      | y!               | y                                            | y                                               | y (published peer review only)                    | n                                               | y                                             | y                                                            | y                                                                                      | y                                            | y                                             | y                            | 10/11         |
| Kirkbride et al 2012 (5)     | y                | y                                            | y                                               | y + unpublished                                   | n                                               | y                                             | y                                                            | y                                                                                      | y                                            | y                                             | y                            | 10/11         |

1. Shea BJ, Grimshaw JM, Wells GA, Boers M, Andersson N, Hamel C, et al. (2007). Development of AMSTAR: a measurement tool to assess the methodological quality of systematic reviews. *BMC Medical Research Methodology*. 7(1):10.
2. Selten JP, van der Ven E, Termorshuizen F. (2020). Migration and psychosis: a meta-analysis of incidence studies. *Psychol Med*. 2020;50(2):303-13.
3. Cantor-Graae E, Selten JP. (2005). Schizophrenia and migration: a meta-analysis and review. *Am J Psychiatry*. 162(1):12-24.
4. Bourque TJ, Hoy K, Shannon C. A (2014). A systematic review and meta-analysis of the ethnic density effect in psychotic disorders. *Soc Psychiatry Psychiatr Epidemiol*. 2014;49(4):519-29.
5. Kirkbride JB, Errazuriz A, Croudace TJ, Morgan C, Jackson D, Boydell J, et al. (2012). Incidence of schizophrenia and other psychoses in England, 1950-2009: a systematic review and meta-analyses. *PLoS One*. 7(3):e31660.

N. B. The included meta-analysis by Nielsen et al [37] was performed upon data from registries which meant that many of the points of the AMSTAR ratings could not be answered.
